# Supplementary material
Source: publisher figshare collection journal article supplement (https://sage.figshare.com/ndownloader/files/14507447)
Supplement: Supplementary file 1 [file 14507447]

## Supplemental Appendix 2. Participant Questionnaire

1. How old are you?: \_\_\_\_\_ years old

If you are unsure or prefer not to answer, please indicate by checking this box:

2. How do you identify your gender identity (i.e. woman, man, two-spirit, transsexual,

etc)?: \_\_\_\_\_

If you are unsure or prefer not to answer, please indicate by checking this box:

3. How do you describe your identity? *For example, Caucasian, Canadian, South Asian, First Nations, etc.):* \_\_\_\_\_

\_\_\_\_\_

If you are unsure or prefer not to answer, please indicate by checking this box:

4. How many years of experience do you have working in obesity treatment?: \_\_\_\_\_

\_\_\_\_\_

5. Approximately how many hours per week are spent in obesity treatment?: \_\_\_\_\_

\_\_\_\_\_

6. How long have you been affiliated with HOPPS?: \_\_\_\_\_

\_\_\_\_\_

7. What type of health care provider are you? Please describe your title and role:

---

---

8. Did you complete health care provider training (ie: medical school or nursing school) in Canada? If not, where did you complete your provider training?:

---

9. What languages do you speak with patients?:

---

---
